1 **Title:** Non-Consensual Sex among Japanese Women in the COVID-19 Pandemic: A Large-  
2 Scale Nationwide Survey-Based Study

3

4 **Authors:**

5 Tomoya Suzuki,<sup>1</sup> Yudai Kaneda,<sup>2</sup> Yasuhiro Kotera,<sup>3</sup> Akihiko Ozaki,<sup>1,4</sup> Tetsuya Tanimoto,<sup>1,5</sup>

6 Divya Bhandari,<sup>1</sup> Sayaka Horiuchi,<sup>6</sup> Takahiro Tabuchi<sup>7</sup>

7

8 **Affiliations:**

9 1. Medical Governance Research Institute, Minato, Tokyo, Japan

10 2. School of Medicine, Hokkaido University, Sapporo, Hokkaido, Japan

11 3. Faculty of Medicine and Health Sciences, University of Nottingham, Nottingham, UK

12 4. Department of Breast and Thyroid Surgery, Jyoban Hospital of Tokiwa Foundation, Iwaki,

13 Fukushima, Japan

14 5. Department of Internal Medicine, Navitas Clinic, Tachikawa, Tokyo, Japan

15 6. Graduate Faculty of Interdisciplinary Research Faculty of Medicine Basic Medicine

16 (Epidemiology/Environmental Medicine), University of Yamanashi

17 7. Cancer Control Center, Osaka International Cancer Institute, Osaka, Japan

18

**NOTE:** This preprint reports new research that has not been certified by peer review and should not be used to guide clinical practice.

19 **Corresponding author:**

20 Tomoya Suzuki

21 Medical Governance Research Institute, Minato, Tokyo, Japan

22 Tel: +81-80-9873-8361

23 E-mail: [tomo1502@gmail.com](mailto:tomo1502@gmail.com)

24

25 **Acknowledgments:**

26 None

27

28 **Authors' Contributions**

29 Conceptualization: TS, AO, and TakahiroT

30 Data analysis: TS and AO

31 Writing original draft: TS and AO

32 Funding acquisition: AO and TakahiroT

33 Project Administration: AO and TakahiroT

34 Review and editing: YudaiK, TetsuyaT, YasuhiroK, BD, SH, and TakahiroT

35 All authors read and approved the final manuscript for publication.

36

37 **Funding Information**

38 This study was funded by the Japan Society for the Promotion of Science (JSPS) KAKENHI  
39 Grants (grant number 17H03589; 19K10671; 19K10446; 18H03107; 18H03062; 21H04856],  
40 the JSPS Grant-in-Aid for Young Scientists (grant number 19K19439], Research Support  
41 Program to Apply the Wisdom of the University to tackle COVID-19-Related Emergency  
42 Problems, University of Tsukuba and Health Labor Sciences Research Grant (grant number  
43 19FA1005; 19FG2001].

44

45 **Conflict of interest statement:**

46 TT reports personal fees from Medical Network Systems, MNES Inc., and Bionics co. ltd.,  
47 outside the submitted work. AO reports personal fees from Medical Network Systems, MNES  
48 Inc., outside the submitted work. All remaining authors have nothing to disclose.

49

50 **Keywords:** COVID-19, Non-consensual sex, sex consent, sexual abuse, sexual violence, rape,  
51 sexual education

52

53 **ABSTRACT**

54 **Background:** Non-consensual sex including rape and sexual assault has been a global concern  
55 and may have been influenced by the COVID-19 pandemic, however the information on this  
56 topic is limited. Therefore, our objective was to survey the incidence rate of non-consensual  
57 sex among Japanese women aged 15-79 years between April to September 2020, following the  
58 COVID-19 pandemic in Japan.

59

60 **Materials and Methods:** We utilized the data obtained from a nationwide, cross-sectional  
61 internet survey conducted in Japan between August and September 2020. Sampling weights  
62 were applied to calculate national estimates, and multivariable logistic regression was  
63 performed to identify factors associated with non-consensual sex. Data was extracted from a  
64 cross-sectional, web-based, self-administered survey of approximately 2.2 million individuals  
65 from the general public, including in men and women.

66

67 **Results:** Excluding men and responses with inconsistencies, the final analysis included 12,809  
68 women participants, with 138 (1.1%) reporting experiencing non-consensual sex within a five-  
69 month period. Being aged 15–29 years and having a worsened mental or economic status were  
70 associated with experiencing non-consensual sex.

71

72 **Conclusions:** Early intervention to prevent individuals from becoming victims of sexual harm

73 should be extended to economically vulnerable and young women, especially during times of

74 societal upheaval such as the COVID-19 pandemic. Additionally, Japan should prioritize the

75 implementation of comprehensive education on the concept of sexual consent.

76

78 **INTRODUCTION**

79 Non-consensual sex refers to engaging in sexual behavior without obtaining consent to touch,  
80 observe, or perform sexual acts involving private body parts that exceed the boundaries of  
81 another person’s body or mind (1,2). Non-consensual sex can take many forms, including rape,  
82 transactional sex, cross-generational sex, unwanted touch, and molestation. In the European  
83 Union, between 45% to 55% of women have experienced sexual harassment since the age of  
84 15 (3). Previous research has identified common factors associated with victims, including ages  
85 between 10 and 30 years, mental vulnerability, and financial hardship (4). Women with these  
86 characteristics are at a higher risk of experiencing non-consensual sex compared to those  
87 without these traits (4). Furthermore, women with these characteristics often find it challenging  
88 to disclose incidents of non-consensual sex to others, making it difficult to address these issues  
89 (5).

90

91 Of note, non-consensual sex is reported to increase due to disruptions in social conditions, such  
92 as natural disasters and worsened economic conditions. For instance, incidents of non-  
93 consensual sex against women dramatically increased during times of economic and  
94 psychological turmoil, such as the 2005 Hurricane Katrina in the United States and the 2011  
95 Great East Japan Earthquake (6–8). Therefore, it is crucial to investigate the prevalence of non-

96 consensual sex after the COVID-19 pandemic.

97

98 At the onset of the COVID-19 pandemic, it was reported that 243 million girls and women  
99 aged 15-49 years had been subjected to non-consensual sex worldwide (9). This was attributed  
100 to the increase in the mandatory stay-at-home measure due to lockdowns, and resulting in  
101 reduced access to social support from teachers, friends and caregivers (10). Awareness of the  
102 status of non-consensual sex during the COVID-19 pandemic has grown in many countries  
103 (11,12). However, the frequency and characteristics of non-consensual sex remain to be  
104 elucidated, not only after but also before the COVID-19 pandemic in Japan to date, partly due  
105 to traditional social norms that discourage open discussions about sexual issues (13).

106

107 The purpose of our study was to report the incidence of non-consensual during the early stages  
108 of the COVID-19 pandemic in Japan. Additionally, we explored potential risk factors such as  
109 mental health conditions, economic changes, and concerns about the lockdown, and anxiety  
110 about the disease.

111

## 112 **METHODS**

### 113 **Context**

114 This cross-sectional study was conducted among a sample of approximately 2.2 million

115 individuals from the general public who participated in a web-based self-reported questionnaire  
116 survey for the Japan COVID-19 and Society Internet Survey (JACSIS) project (14). The survey  
117 was administered by the well-established internet research agency, Rakuten Insight, Inc., which  
118 has been utilized in prior research studies (14,15). Data were collected from April 2020 to  
119 September 30, 2020. The prefectures where the selected individuals lived represented all  
120 prefectures in Japan, as indicated in previous studies (16).

121

## 122 **Patient and public involvement**

123 No patients were involved in this study.

124

## 125 **Participants**

126 The survey invitation was extended to 28,000 individuals out of 2.2 million registered with the  
127 survey agency, Rakuten Insight, Inc. Using a computer algorithm, study participants were  
128 selected through random sampling.

129

## 130 **Analysis Subjects**

131 Respondents who self-identified as women in the questionnaire were included in our analysis.

132 Among all the survey respondents totaling 28,000, the number of valid women participants for



133 analysis was 12,809.

134

### 135 **Outcome Variable: Experience of Non-Consensual Sex**

136 The focus of this study was to examine instances of non-consensual sex occurring between

137 from April 2020 to 30 September 2020. Participants were not questioned about specific

138 details but were instead asked to respond with a simple “yes” or “no” to indicate whether they

139 had experienced such incidents.

140

### 141 **Exposure Variables**

#### 142 **Sociodemographic characteristics**

143 As independent variables, demographics were included, encompassing gender, age groups

144 (15–19, 20–29, 30–39, 40–49, 50–59, 60–69, 70–79 years), marital status (unmarried, married

145 and widowed/separated), having children (none or more than one), educational attainment

146 (high school educated, college educated or higher), employment status (any type of

147 employment, unemployed), household income level, which was calculated as dividing the

148 household income by the square root of household size (categorized by the tertials of

149 household equivalent income (low, <JPY2.5 million/US\$25 000/£16 667; intermediate,

150 JPY2.5–JPY4.3 million/US\$25 000–US\$43 000/£16 667–£28 667; high, >JPY4.3

151 million/<US\$43 000/<£28 667; unknown/declined to answer)), and smoking status (not  
152 smoker or current smoker).(14)

153

#### 154 **Living Area Classification**

155 Regarding living regions, all 47 prefectures were divided into the following three areas based  
156 on the date of the Declaration of the State of Emergency (DSE area) (17,18). “Designated as  
157 DSE on April 7, 2020”, “Designated as DSE on April 16, 2020”, and “Others”, “Specific  
158 alert designated on April 7, 2020” included Tokyo, Kanagawa, Chiba, Saitama, Osaka,  
159 Hyogo, and Fukuoka. “Specific alert designated on April 16, 2020” included Hokkaido,  
160 Ibaraki, Ishikawa, Gifu, Aichi, and Kyoto. “Others” comprised the remaining 34 prefectures.  
161 These categorization were determined by the Japanese Government using three indicators:  
162 the cumulative number of infected people, epidemiological trend, medical capacity and  
163 surveillance system (17). During the target period, people living in the relevant prefectures  
164 were advised to avoid unnecessarily outings, limit the use of entertainment facilities, and  
165 adhere to restrictions on economic activities (19).

166

#### 167 **Fear of COVID-19 Scale**

168 The Japanese version Fear of COVID-19 Scale (FCV-19S) was used to assess participants’

169 fear of the COVID-19 infection (20). This instrument comprises seven items rated on a 5-  
170 point scale (1 = “strongly disagree”; 5 = “strongly agree”). Consequently, the total score  
171 ranged from 7 to 35, with a higher score indicating a greater fear of COVID-19. Satisfactory  
172 internal consistency and validation of the scale were confirmed in the original seven-item  
173 scale ( $\alpha = .82$ ) (21).

174

### 175 **Personal Health and Economic Statuses**

176 Based on previous research, an examination was conducted to determine whether health and  
177 economic statuses were associated with non-consensual sex (4). The health-related questions  
178 included the following: Self-rated health (good or other than good), “Any change in mental  
179 state in the last month compared to before January 2020 ?” (Worse, No change, Getting  
180 better, I do not know)”, Suicidal thoughts (Happened since before COVID-19 pandemic,  
181 First experienced during the COVID-19 pandemic or Never ), Desire not to talk to anyone  
182 due to worries (Yes or No), Feeling isolated (Yes or No), Any cancellation of a family  
183 gathering due to the COVID-19 pandemic (Yes or No), Non-payment of salary (Happened  
184 since before COVID-19 pandemic, First happened during the COVID-19 pandemic, Never),  
185 and Lack of money to buy necessities of life (Happened since before COVID-19 pandemic,  
186 First Happened during the COVID-19 pandemic or Never).

187

188 **Statistical Procedure**

189 To achieve the purpose of identifying the incidence of non-consensual sexual activity and its  
190 associated factors during the COVID-19 outbreak, two types of analysis methods were  
191 employed.

192

193 First, to determine the incidence rate, we divided the sample into two groups: those who  
194 responded “Yes” to the question of “Any non-consensual sex” and who did not. The number  
195 and percentage of individuals in these two categories, along with the  $\chi$ -square test, were  
196 calculated for each independent variable. The number, percentage, and p-value of each item  
197 are described in Table 1.

198

199 Second, a multivariate logistic regression analysis was conducted to identify potential  
200 predictive factors in the occurrence of non-consensual sex. This analysis encompassed all the  
201 aforementioned exposure variables, and odds ratios with 95% confidence intervals (CIs) were  
202 estimated (Table 2). As a sub-analysis, the incidence of suicidal ideation by age was also  
203 calculated.

204

205 It should be noted that because the characteristics of the participants in this Internet survey may  
206 differ from the general population (i.e., individuals with low digital skills might be excluded),  
207 a weighted analysis was performed to minimize differences in demographics, economic status,  
208 and health-related characteristics. This approach aimed to approximate national estimates from  
209 a nationally representative survey.

210

211 Statistical significance was defined as  $p < 0.05$ . The data were analyzed using STATA V.16.1  
212 (Stata Corp, College Station, Texas, USA).

213

## 214 **Ethics**

215 This study adhered to ethical standards in accordance with the 1975 Declaration of Helsinki,  
216 as revised in 2013. Prior to participating in the online survey, all participants provided informed  
217 consent through a web-based consent form. The Research Ethics Committee of the Osaka  
218 International Cancer Institute reviewed and approved the study (No. 20084).

219

220 **Results**

221 The total number of respondents, including both men and women, was 28,000. Out of these,  
 222 2,518 participants who provided invalid responses (e.g., the same number is used for all survey  
 223 items; incomplete responses) and 12,673 men were excluded. Consequently, the final analysis  
 224 sample consisted of 12,809 women, whose ages ranged from 15 and 79 years old.

225

226 Table 1 shows the characteristics of the weighted proportion of non-consensual sex among all  
 227 participants. The overall weighted incidence rate for non-consensual sex during the five-month  
 228 period (April to September 2020) was 1.1 %. The incidence rate of non-consensual sex was  
 229 higher among individuals aged 15-19 years (1.1%) and 20-29 years (2.4%), which exceeded  
 230 the rates in other age groups. Women with jobs (1.5%) had a higher incidence rate than those  
 231 without jobs (0.7%).

232

233 Table 1: Demographics and Descriptive Statistics of Weighted Women Participants during the  
 234 Five-Month from April to September 2020

| Variable             | Non-Consensual Sex April-Sept 2020 |               |
|----------------------|------------------------------------|---------------|
|                      | Total (n=12,809)                   |               |
|                      | Yes<br>N (%)                       | No<br>N (%)   |
| Total                | 138 (1.1)                          | 12,671 (98.9) |
| Age                  |                                    |               |
| 15-19                | 8.0 (1.1)                          | 707 (98.9)    |
| 20-29                | 37 (2.4)                           | 1543 (97.7)   |
| 30-39                | 38 (2.0)                           | 1845 (98.0)   |
| 40-49                | 25 (1.0)                           | 2395 (98.9)   |
| 50-59                | 15 (0.7)                           | 2097 (99.3)   |
| 60-69                | 15 (0.7)                           | 2127 (99.3)   |
| 70-79                | 1.0 (0.1)                          | 1956 (99.9)   |
| Marital status       |                                    |               |
| Married              | 88 (1.1)                           | 7929 (98.9)   |
| Never married        | 29 (0.9)                           | 3276 (99.1)   |
| Widowed or separated | 20 (1.4)                           | 1467 (98.7)   |

|                                                                       |           |              |
|-----------------------------------------------------------------------|-----------|--------------|
| Having children                                                       |           |              |
| No children                                                           | 56 (0.9)  | 6006 (99.1)  |
| At least one or more                                                  | 99 (1.5)  | 6648 (98.5)  |
| Educational attainment                                                |           |              |
| High school or lower                                                  | 54 (1.0)  | 4261 (99.0)  |
| College/university or graduate school                                 | 83 (1.2)  | 7136 (98.9)  |
| Employment status                                                     |           |              |
| Unemployed                                                            | 43 (0.7)  | 6259 (99.3)  |
| In employment                                                         | 95 (1.5)  | 6412 (98.5)  |
| Smoking status                                                        |           |              |
| Not smoker                                                            | 117 (1.0) | 11404(99.0)  |
| Current smoker                                                        | 20 (1.6)  | 1268 (98.4)  |
| Household Income (million JPY)                                        |           |              |
| Low                                                                   | 53 (1.7)  | 3144 (98.3)  |
| Moderate                                                              | 43 (1.3)  | 3226 (98.7)  |
| High                                                                  | 26 (1.0)  | 2669 (99.0)  |
| Unknown                                                               | 14 (0.4)  | 3632 (99.6)  |
| Region                                                                |           |              |
| Other                                                                 | 86 (1.3)  | 6628 (98.7)  |
| DSE (April 16-)                                                       | 16 (0.8)  | 2117 (99.2)  |
| DSE (April 7-)                                                        | 31 (0.9)  | 3568 (99.1)  |
| Fear of COVID-19 <sup>†</sup>                                         |           |              |
| 7–15                                                                  | 41 (1.2)  | 3402 (98.8)  |
| 16–20                                                                 | 26 (0.6)  | 4173 (99.4)  |
| 21–25                                                                 | 34 (1.0)  | 3405 (99.0)  |
| 26–35                                                                 | 37 (2.1)  | 1691 (97.9)  |
| Self-rated health                                                     |           |              |
| Other than good                                                       | 94 (1.3)  | 7349 (98.7)  |
| Good                                                                  | 44 (0.8)  | 5322 (99.2)  |
| Mental state change in the last month compared to before January 2020 |           |              |
| Worse                                                                 | 59 (2.2)  | 2662 (97.8)  |
| None                                                                  | 56 (0.6)  | 8998 (99.4)  |
| Better                                                                | 19 (3.3)  | 547 (96.7)   |
| Unknown                                                               | 4 (0.7)   | 500 (99.3)   |
| Suicidal thoughts                                                     |           |              |
| Yes, since before COVID-19                                            | 43 (4.0)  | 1039 (95.1)  |
| First happened                                                        | 20 (3.5)  | 539 (96.5)   |
| Never                                                                 | 75 (0.7)  | 11093(99.3)  |
| Desire not to talk to anyone due to worries                           |           |              |
| Yes                                                                   | 76 (4.0)  | 2487 (97.0)  |
| No                                                                    | 62 (0.6)  | 10184 (99.4) |
| Feeling isolated                                                      |           |              |
| Yes                                                                   | 74 (3.7)  | 1925 (96.3)  |
| No                                                                    | 64 (0.6)  | 10747 (99.4) |
| Cancellation of a family gathering due to the pandemic                |           |              |
| Yes                                                                   | 10 (0.6)  | 1730 (99.4)  |
| No                                                                    | 127 (1.2) | 10940(98.9)  |
| Non-payment of salary                                                 |           |              |
| Yes, since before COVID-19                                            | 15 (10.3) | 133 (89.7)   |
| First experience                                                      | 8 (10.4)  | 67 (89.6)    |
| Never                                                                 | 115 (0.9) | 12471 (99.1) |
| Lack of money to buy necessities                                      |           |              |
| Yes, since before COVID-19                                            | 35 (4.8)  | 692 (95.2)   |
| First experience                                                      | 22 (6.1)  | 340 (94.0)   |
| Never                                                                 | 81 (0.7)  | 11639 (99.3) |

235

236 <sup>†</sup> Classification of the Fear of COVID-19 scale scores refers to previous studies (22).

237 All estimates account for survey weights.

238

239 There was no significant difference in the incidence rate of non-consensual sex among those

240 living in areas designated as DSE (0.9 % on April 7, 2020, 0.8 % on April 16, 2020, 1.3%

241 others). A higher FCV-19S (2.1%, [26-35]) was associated with a higher incidence rate

242 compared to other scores (1.2% [score from 7 to 15], 0.6% [score from 16 to 20], 1.0% [score  
243 from 21 to 25]).

244

245 The incidence rate of participants who reported feeling “worse” (2.2%) or “getting better”  
246 (4.4%) before the COVID-19 pandemic was higher than those who “No change” (0.6%) and  
247 “I do not know” (0.7%). Participants who had suicidal thoughts (4.0% since before COVID-  
248 19, 3.5% first happened) had a higher incidence rate than those who had never experienced  
249 them (0.7%). Participants who reported feeling isolated (3.7%) had a higher incidence rate than  
250 those who had never felt isolated (0.6%). Additionally, participants who had experienced non-  
251 payment of salary (10.3% since before COVID-19, 10.4% first experience) had a higher  
252 incidence rate than those who had never experienced it (0.9%). Similarly, participants who had  
253 experienced a lack of money to buy necessities (4.8% since before COVID-19, 6.1% first  
254 experience) had a higher incidence rate than those who had never experienced it (0.7%).

255

256 Table 2 shows the factors associated with non-consensual sex among participants. Participants  
257 aged 15 to 19 years and those aged 20 to 29 years had higher odds of experiencing non-  
258 consensual sex compared to participants in other aging groups. (Aged 15- 19 years old: OR  
259 4.74, 95%CI 1.37 – 16.4, Aged 20-29 years old: OR 3.20, 95%CI 1.09 – 9.38). Employed  
260 women participants were associated with higher odds of experiencing non-consensual sex than



261 unemployed participants (OR 1.68, 95% CI 1.36-2.07).

262

263 Table 2: Factors Associated with Non-Consensual Sex Among Weighted Participants During  
264 the-Five-Month from April to September 2020

|                                                                          | Weighted<br>sample | Weighted<br>incidence | Crude Odds<br>(95% CI) | Adjusted rate<br>% (95% CI) | Adjusted odds ratio<br>(95% CI) | P-value |
|--------------------------------------------------------------------------|--------------------|-----------------------|------------------------|-----------------------------|---------------------------------|---------|
| Total                                                                    | 12,809             | 138 (1.1)             |                        |                             |                                 |         |
| Age                                                                      |                    |                       |                        |                             |                                 |         |
| 15- 19                                                                   | 715                | 8.0 (1.1)             | 2.26(1.29, 3.94)       | 3.4 (1.3, 5.5)              | 4.74(1.37, 16.4)                | 0.014   |
| 20-29                                                                    | 1,580              | 37.1(2.4)             | 1.74(1.07, 2.81)       | 2.4 (1.3, 3.4)              | 3.2 (1.09, 9.38)                | 0.034   |
| 30-39                                                                    | 1,883              | 37.7 (2.0)            | 1.37(0.84, 2.23)       | 1.5 (0.9, 2.1)              | 1.88 (0.63, 5.55)               | 0.256   |
| 40-49                                                                    | 2,420              | 24.5 (1.0)            | Reference              | 0.8 (0.3, 1.3)              | Reference                       | -       |
| 50-59                                                                    | 2,112              | 14.5 (0.7)            | 0.43(0.22, 0.83)       | 0.8 (0.5, 1.0)              | 0.90 (0.37, 2.19)               | 0.822   |
| 60-69                                                                    | 2,142              | 14.8 (0.7)            | 0.49(0.26, 0.92)       | 1.1 (0.6, 1.7)              | 1.35 (0.45, 4.06)               | 0.585   |
| 70-79                                                                    | 1,957              | 1.0 (0.1)             | 0.23(0.10, 0.55)       | 0.05 (0.0, 0.1)             | 0.05 (0.02, 0.19)               | <0.001  |
| Marital status                                                           |                    |                       |                        |                             |                                 |         |
| Married                                                                  | 8,017              | 88.3 (1.2)            | Reference              | 1.6 (1.2, 2.0)              | Reference                       |         |
| Never married                                                            | 3,304              | 29.0 (0.8)            | 1.35(0.96, 1.90)       | 0.5 (0.1, 0.8)              | 0.26 (0.10, 0.70)               | 0.007   |
| Widowed or separated                                                     | 1,487              | 20.3 (1.2)            | 0.83(0.48, 1.43)       | 1.5 (0.8, 2.1)              | 0.92 (0.69, 1.24)               | 0.599   |
| Having children                                                          |                    |                       |                        |                             |                                 |         |
| No children                                                              | 6,302              | 42.8 (0.7)            | Reference              | 0.8 (0.7, 0.9)              | Reference                       |         |
| One or more                                                              | 6,507              | 94.9 (1.4)            | 1.60(1.15, 2.22)       | 1.2 (1.1, 1.4)              | 1.58 (1.23, 2.02)               | <0.001  |
| Educational Attainment                                                   |                    |                       |                        |                             |                                 |         |
| College/university or graduate school                                    | 7,219              | 83.3 (1.0)            | Reference              | 0.9 (0.8, 0.9)              | Reference                       |         |
| High school or less                                                      | 5,590              | 54.4 (1.3)            | 0.76(0.53, 1.08)       | 1.3 (1.2, 1.3)              | 0.66 (0.57, 0.75)               | <0.001  |
| Employment Status                                                        |                    |                       |                        |                             |                                 |         |
| Unemployed                                                               | 6,237              | 43.2 (0.7)            | Reference              | 0.8 (0.7, 0.9)              | Reference                       |         |
| Employed                                                                 | 6,572              | 94.5 (1.5)            | 1.701(1.23, 2.37)      | 1.3 (1.2, 1.4)              | 1.68 (1.36, 2.07)               | <0.001  |
| Smoking status                                                           |                    |                       |                        |                             |                                 |         |
| Not smoker                                                               | 11,521             | 117.4 (1.0)           | Reference              | 1.1 (1.0,1.2)               | Reference                       |         |
| Current smoker                                                           | 1,288              | 20.3 (1.6)            | 1.63 (1.05, 2.53)      | 1.0 (0.3,1.6)               | 0.89 (0.39, 2.04)               | 0.779   |
| Household Income (million JPY)                                           |                    |                       |                        |                             |                                 |         |
| Low                                                                      | 3,579              | 57.2 (1.5)            | Reference              | 1.4 (0.9, 1.8)              | Reference                       |         |
| Moderate                                                                 | 3,271              | 49.3 (1.6)            | 1.28(0.68, 1.56)       | 1.4 (1.4, 1.5)              | 1.06 (0.77, 1.46)               | 0.715   |
| High                                                                     | 2,313              | 16.6 (0.6)            | 1.01(0.66, 1.53)       | 0.8 (0.3, 1.3)              | 0.57 (0.21, 1.56)               | 0.275   |
| Unknown                                                                  | 3,647              | 14.5 (0.5)            | 0.467(0.28, 0.79)      | 0.4 (0.2, 0.7)              | 0.29 (0.11, 0.75)               | 0.011   |
| Region                                                                   |                    |                       |                        |                             |                                 |         |
| Other                                                                    | 6,715              | 86.4 (2.0)            | Reference              | 1.1 (1.0, 1.1)              | Reference                       |         |
| DES (April 13-)                                                          | 2,133              | 16.3 (0.8)            | 1.12(0.70, 1.78)       | 1.1 (1.1, 1.2)              | 1.07 (0.99, 1.15)               | 0.100   |
| DES (April 7-)                                                           | 3,599              | 31.2 (0.5)            | 1.03(0.72, 1.48)       | 1.0 (1.0, 1.1)              | 0.94 (0.68, 1.24)               | 0.261   |
| Fear of COVID-19                                                         |                    |                       |                        |                             |                                 |         |
| 7-15                                                                     | 3,443              | 40.9 (1.2)            | Reference              | 1.4 (1.1, 1.7)              | Reference                       |         |
| 16-20                                                                    | 4,199              | 25.9 (0.6)            | 0.781(0.50, 1.21)      | 0.7 (0.4, 1.0)              | 0.45 (0.23, 0.88)               | 0.019   |
| 21-25                                                                    | 3,439              | 34.3 (0.9)            | 0.832(0.53, 1.30)      | 0.9 (0.9, 1.0)              | 0.62 (0.47, 0.81)               | 0.001   |
| 26-35                                                                    | 1,728              | 36.5 (2.3)            | 2.00(1.28, 3.11)       | 1.4 (1.3, 1.5)              | 1.01 (0.84, 1.21)               | 0.927   |
| Self-rated health                                                        |                    |                       |                        |                             |                                 |         |
| Good                                                                     | 5,366              | 43.8 (0.7)            | Reference              | 0.9 (0.8, 1.1)              | Reference                       |         |
| Other than good                                                          | 7,443              | 93.9 (1.5)            | 1.39(1.01, 1.91)       | 1.2 (1.1, 1.2)              | 1.25 (0.98, 1.48)               | 0.069   |
| Mental state change in the last month compared<br>to before January 2020 |                    |                       |                        |                             |                                 |         |
| Worse                                                                    | 9,054              | 56.0 (0.6)            | Reference              | 0.9 (0.7, 1.2)              | Reference                       |         |
| None                                                                     | 2,686              | 59.3 (2.2)            | 3.14(2.19, 4.49)       | 1.1 (0.8, 1.5)              | 1.25 (0.67, 2.33)               | 0.480   |
| Better                                                                   | 566                | 18.8 (3.0)            | 6.53(4.15, 10.30)      | 1.8 (1.4, 2.3)              | 2.11 (1.39, 3.18)               | < 0.001 |
| Unknown                                                                  | 504                | 3.5 (0.8)             | 1.55(0.622, 3.88)      | 0.8 (0.7, 0.8)              | 0.80 (0.53, 1.20)               | 0.286   |
| Suicidal thoughts                                                        |                    |                       |                        |                             |                                 |         |
| Yes, since before COVID-19                                               | 11,169             | 75.2 (0.7)            | Reference              | 0.9 (0.8, 1.0)              | Reference                       |         |
| First happened                                                           | 1,082              | 42.8 (3.9)            | 5.85(4.06, 8.43)       | 1.6 (1.4, 1.8)              | 1.85 (1.50, 2.27)               | <0.001  |
| Never                                                                    | 558                | 19.7 (4.3)            | 7.66(4.85, 12.01)      | 1.1 (0.7, 1.5)              | 1.25 (0.79, 1.97)               | 0.337   |
| Desire not to talk to anyone due to worries                              |                    |                       |                        |                             |                                 |         |
| Yes                                                                      | 10,246             | 61.5 (0.6)            | Reference              | 0.8 (0.7, 0.9)              | Reference                       |         |
| No                                                                       | 2,563              | 76.2 (3.2)            | 7.27 (5.24, 10.08)     | 1.5 (1.3, 1.7)              | 1.98 (1.56, 2.51)               | <0.001  |
| Feeling isolated                                                         |                    |                       |                        |                             |                                 |         |
| Yes                                                                      | 10,811             | 64.1 (0.6)            | Reference              | 0.8 (0.3, 1.2)              | Reference                       |         |

|                                                                 |        |             |                    |                |                   |        |
|-----------------------------------------------------------------|--------|-------------|--------------------|----------------|-------------------|--------|
| No<br>Cancellation of a family gathering due to the<br>pandemic | 1,988  | 73.6 (3.4)  | 8.35 (6.02, 11.60) | 1.8 (0.6, 2.9) | 2.52 (0.70, 9.04) | 0.156  |
| Yes                                                             | 1,741  | 83.3 (1.0)  | Reference          | 0.5 (0.1, 0.9) | Reference         |        |
| No                                                              | 11,068 | 54.4 (1.3)  | 1.035(0.64, 1.68)  | 1.2 (1.1, 1.3) | 2.58 (1.07, 6.25) | 0.035  |
| Non-payment of salary                                           |        |             |                    |                |                   |        |
| Yes, since before COVID-19                                      | 12,586 | 7.8 (7.3)   | Reference          | 1.0 (0.9, 1.0) | Reference         |        |
| First experience                                                | 148    | 114.6 (0.9) | 12.15(7.02, 21.01) | 3.9 (2.9, 4.9) | 4.88 (3.42, 6.97) | <0.001 |
| Never                                                           | 75     | 15.3 (10.4) | 15.13(8.40, 27.28) | 1.9 (1.1, 2.8) | 2.17 (1.36, 3.48) | 0.001  |
| Lack of money to buy necessities                                |        |             |                    |                |                   |        |
| Yes, since before COVID-19                                      | 11,720 | 80.5 (0.7)  | Reference          | 0.8 (0.7, 0.9) | Reference         |        |
| First experience                                                | 727    | 34.9 (5.7)  | 6.97(4.68, 10.38)  | 2.2 (1.9, 2.6) | 2.94 (2.27, 3.81) | <0.001 |
| Never                                                           | 362    | 22.2 (6.1)  | 7.62(4.74, 12.25)  | 1.9 (1.1, 2.8) | 2.50 (1.76, 3.55) | <0.001 |

265

266 Participants who did not receive salaries or compensations were more likely to experience non-  
 267 consensual sex than those who did: (experienced since before COVID-19) OR 4.88, 95% CI  
 268 3.42-6.97; (first experience during COVID-19) OR 2.17, 95% CI 1.36-3.48. Similarly,  
 269 participants who could not afford to buy life necessities were more likely to experiencing non-  
 270 consensual sex than the others (OR 2.5, 95% CI 1.76-3.55).

271

272 Lastly, participants who had suicidal thoughts were more likely to experience non-consensual  
 273 sex than those who did not: (since before COVID-19: OR 1.85, 95% CI 1.50-2.27). Participants  
 274 with reported feeling isolated were more likely to experience non-consensual sex than those  
 275 who did not (OR 1.98, 95% CI 1.56-2.51). The result of the sub-analysis showed suicidal  
 276 ideation was present in 20% of all women aged between 15 and 19 years.

277

278 Figure 1: Forest plot illustrating incidence rate of non-consensual sex for each factor  
 279 (reference) among the participants.

280

281

[Insert Figure 1]

282

283 Note: Significant positive factors associated with non-consensual sex included the age group  
284 “Aged 15–29 years old”, as well as worsened mental or economic status were associated with  
285 an increased likelihood of experiencing non-consensual sex.

286

## 287 **Discussion**

288 This study assessed the incidence of non-consensual sex in Japan during COVID-19 and

289 explored associated factors while applying weighing to mitigate biases related to online

290 participation. The overall rate of participants reporting non-consensual sex was 1.2% over a

291 five-month period from April to September 2020. Factors associated with experiencing non-

292 consensual sex among participants included ages between 15 and 29, employment status,

293 deteriorating mental health condition, suicidal thoughts, a desire not to talk to anyone, feeling

294 isolated, and challenging economic circumstances.

295

296 In Japan, research related to sexual matters is limited. We believe this limitation stems from

297 the fact that sexual topics are often considered taboo with Japanese education institutions, and

298 sexual education in Japan lags behind that in Western countries (22–24). Additionally, the

299 understanding of obtaining sexual consent, which is essential in all sexual activities, lags

300 behind compared to countries that are known to be advanced in sex education in some of

301 Europe countries (13,22,25). For instance, the Netherlands had sex education compulsory from

302 elementary school, and Denmark was one of the European countries that criminalized non-  
303 consensual sexual acts in 2020 at the time of our survey. Despite the efforts in Europe,  
304 conducting such a comprehensive study on a large scale was of significant importance as it  
305 ventured into uncharted territory in Japan.

306

307 Globally, concern arose about an increase in sexual violence against women around April 2020,  
308 during the early stages of the COVID-19 outbreak. However, specific incidence data were  
309 limited (12,26). While some countries reported an uptick in sexual violence cases (e.g., South  
310 Africa, Bangladesh (12,27)), others reported a significant decrease after implementing  
311 lockdown measures, as seen in Australia and Canada (28,29). In Japan, the available data  
312 included two key pieces of information from the police office: the reported prevalence of sexual  
313 violence among women, which stood at 6.9% (30), and a notable increase in the number of  
314 sexual assault victims seeking consultations, approximately 1.2 times higher in 2020 compared  
315 to 2019 (31,32). However, the incidence rate had not been thoroughly investigated during the  
316 COVID-19 pandemic, resulting in a scarcity of information regarding the incidence of sexual  
317 violence against women (33). It is important to note that our study did not have access to a  
318 comparative dataset from a different time point to evaluate percentage change in the incidence  
319 of sexual violence. Nevertheless, we were able to fundamental data concerning non-consensual

320 sex for the first time in Japan.

321

322 Approximately 80% of the women who reported experiencing non-consensual sex fell within  
323 the age range of 15 and 49 years old. Notably, the incidence of reported non-consensual sex  
324 dramatically decreased among women aged 50 to 79 years. There was a significant increase in  
325 the risk of non-consensual sex within the age group 15 to 29 years. This pattern is consistent  
326 with reports from the United States and Japan, where individuals in their late teens to early  
327 thirties are identified as the age group at the highest risk of experiencing rape (30,34).

328

329 It is crucial to recognize that young women who have been victims of sexual assault are also  
330 more likely to experience lifetime suicide attempts and post-traumatic stress symptom.  
331 Specifically, research indicates that teenage sexual trauma is strongly correlate with suicide  
332 attempts (35–38). Additionally, our sub-analysis results revealed that suicidal ideation was  
333 present in 20% of all women aged between 15 and 19 years. Based on the aforementioned  
334 findings and considerations, we firmly believe that measures to protect the younger generation  
335 are imperative (39). As mentioned previously, Japan falls behind comprehensive sexual  
336 education for the younger generation. We contend that it is necessary to incorporate detailed  
337 explanations and the factors and circumstances that lead to unwanted sexual experiences

338 involving the non-consensual sex into Japanese school curriculum.

339

340 Concretely, employed participants were more likely to be in contact with others than those who

341 are unemployed. This time, we have not specifically investigated the locations where non-

342 consensual sex has occurred. Therefore, it can be said that employed women may become

343 victims of non-consensual sex, potentially by someone within their workplace or close social

344 circle. Indeed, reports from both Japan and the United States have indicated that non-

345 consensual sex is most frequently perpetrated by individuals known to the victims (30,40).

346 Employed people have an extra circle of known individuals from their workplace compared to

347 unemployed people.

348

349 Intriguingly, women who did not receive a salary and lacked the financial means to purchase

350 necessities were at an elevated risk of experiencing non-consensual sex. While this appears to

351 be the opposite of the above finding suggesting that being employed could be associated with

352 a higher odds of experiencing non-consensual sex, this aligns with previous studies showing a

353 connection between deteriorating economic conditions and an increased incidence of sexual

354 assault that have established a connection between deteriorating economic conditions and an

355 increased incidence of sexual assault (41,42), which is consistent with our findings. There are

356 two possible explanations for this association: First, worsening personal economic  
357 circumstances may lead women to engage in occupations with a higher risk of non-consensual  
358 sex, such as working in the sex industry. Second, women in precarious financial situation often  
359 experience psychological pressure to secure and maintain employment (42). Under such  
360 pressure, they may become psychologically vulnerable to sexual coercion from their employers  
361 in exchange for job security (42). Future research should explore people in these circumstances  
362 in depth to better under-explored areas in Japan.

363

364 While 66% of the participants lived in areas under DSE, our study did not find a significant  
365 association between non-consensual sex and living in the DSE area. However, we did identify  
366 a significant correlation between experiencing a moderate level of fear related to the COVID-  
367 19 pandemic (scoring 16-25 points) and instances of non-consensual sex. This suggests that  
368 participants who stayed at home more frequently might have become more vulnerable to non-  
369 consensual sexual experiences by their partner. In fact, non-consensual sex was more  
370 frequently reported as being perpetrated by partner during the COVID-19 pandemic, and there  
371 was an observed increase in the number of domestic problems during this period (31).

372

373 Based on the considerations outlined above, there is a heightened risk of non-consensual sexual

374 activity occurred during the COVID-19 pandemic, particularly among young, impoverished  
375 women. Consequently, it is of utmost importance to identify and provide economic and  
376 psychosocial support to these vulnerable individuals during times of social disruption.  
377 Furthermore, a notable deficiency in the current landscape of Japan is the absence of  
378 comprehensive education regarding the concept of sexual consent. Specifically, there is an  
379 urgent need for thorough instruction emphasizing the importance of men obtaining consent  
380 from women before engaging in any sexual activities (43). This education should be  
381 disseminated at both the local and national levels, as it may necessitate a societal shift in  
382 awareness at all levels.

383

384 In a noteworthy development, on June 16, 2023, Japan amended the legal term “Forced Sexual  
385 Intercourse Crime” to “Non-consensual Sexual Intercourse Crime”, explicitly stipulating that  
386 any sexual activity without consent is now considered a criminal offense (44). We anticipate  
387 that this alteration will provide a means of support to victims who have endured their suffering  
388 in silence and were unable to report their experiences.

389

### 390 **Limitations**

391 This study has several limitations. First, as it is a web-based survey, participants in an internet-



392 based study may not be representative of the general population. To address this potential bias,  
393 we performed statistical adjustments. However, it is important to note that this method may not  
394 fully account for the differences between participants in an internet survey and those in a  
395 nationwide representative survey, which poses challenges to the generalizability of our findings.  
396 To mitigate this limitation, harmonizing our data with a major national and representative  
397 cross-sectional study would enable us to pool data and potentially adjust for the factor of  
398 “being a respondent in an internet survey”, as has been done in other JACSIS studies (45).

399

400 The second limitation is related to the cross-sectional nature of survey. This design does not  
401 allow us to establish causal relationships between the presence or absence of non-consensual  
402 sex and factors such as economic status or suicidal ideation (46).

403

404 The third limitation concerns the definition of “Non-consensual sex”. We did not explicitly  
405 seek a specific definition of non-consensual sexual activity, which may vary by generations  
406 or community cultures (e.g., workplace community, religious community). Sex education in  
407 Japan is known to be under-developed, therefore respondents may not necessarily share a  
408 relatively standardized understanding of this concept. We did inquire about employment status,  
409 but we did not specifically ask about non-consensual sexual activity in the workplace. However,

410 we observed a significant correlation between being employed and experiencing non-  
411 consensual sexual activity. Also, we did not inquire the place of experienced non-consensual  
412 sex such as workplace. We observed a significant correlation between being employed and  
413 experiencing non-consensual sexual activity. However, it was not possible to ascertain whether  
414 non-consensual sex had occurred in the workplace.

415

416 The Forth, as mentioned in the section on “Analysis Subjects”, our questionnaire only asked  
417 whether respondents self-identified as male or female. Therefore, among those who self-  
418 identified as female, there is a possibility that transgender women or individuals who identify  
419 as bigender may also be included. This follows the convention in Japan, where many national  
420 surveys still only inquire about male or female gender identities.

421

## 422 **Conclusion**

423 Early intervention to prevent individuals from becoming victims of sexual harm should be  
424 extended to economically vulnerable and young women, especially during times of societal  
425 upheaval such as the COVID-19 pandemic. Additionally, Japan should prioritize the  
426 implementation of comprehensive education on the concept of sexual consent.

427

## 428 **References**

- 429 1. Jozkowski KN, Sanders S, Peterson ZD, Dennis B, Reece M. Consenting to sexual  
430 activity: The development and psychometric assessment of dual measures of consent.  
431 Arch Sex Behav [Internet]. 2014 Jan 23 [cited 2022 Nov 27];43(3):437–50. Available  
432 from: <https://link.springer.com/article/10.1007/s10508-013-0225-7>
- 433 2. Jozkowski KN, Peterson ZD. Assessing the Validity and Reliability of the Perceptions  
434 of the Consent to Sex Scale. <http://dx.doi.org/101080/002244992012757282> [Internet].  
435 2014 Aug 1 [cited 2022 Nov 27];51(6):632–45. Available from:  
436 <https://www.tandfonline.com/doi/abs/10.1080/00224499.2012.757282>
- 437 3. European Union Agency for Fundamental Rights. Violence against women : an  
438 EU-wide survey. Main results report. Hum Rights Doc online [Internet]. 2014 [cited  
439 2022 Dec 15]; Available from:  
440 [https://www.academia.edu/31782914/Violence\\_against\\_women\\_an\\_EU\\_wide\\_survey](https://www.academia.edu/31782914/Violence_against_women_an_EU_wide_survey)  
441 [\\_Main\\_results\\_report](#)
- 442 4. Tharp AT, DeGue S, Valle LA, Brookmeyer KA, Massetti GM, Matjasko JL. A  
443 Systematic Qualitative Review of Risk and Protective Factors for Sexual Violence  
444 Perpetration. Trauma, Violence, Abus. 2022 Apr;14(2):133–67.
- 445 5. Delker BC, Salton R, McLean KC, Syed M. Who has to tell their trauma story and

- 446 how hard will it be? Influence of cultural stigma and narrative redemption on the  
447 storying of sexual violence. PLoS One [Internet]. 2020 Jun 5 [cited 2022 Nov  
448 2];15(6):e0234201. Available from:  
449 <https://journals.plos.org/plosone/article?id=10.1371/journal.pone.0234201>
- 450 6. Anastario M, Lawry L, Shehab N. Increased Gender-based Violence Among Women  
451 Internally Displaced in Mississippi 2 Years Post–Hurricane Katrina. Disaster Med  
452 Public Health Prep [Internet]. 2009 Mar [cited 2022 Jun 23];3(1):18–26. Available  
453 from: [https://www.cambridge.org/core/journals/disaster-medicine-and-public-health-  
454 preparedness/article/abs/increased-genderbased-violence-among-women-internally-  
455 displaced-in-mississippi-2-years-posthurricane-  
456 katrina/D576CBEB73639E69823A1391B5BF160B](https://www.cambridge.org/core/journals/disaster-medicine-and-public-health-preparedness/article/abs/increased-genderbased-violence-among-women-internally-displaced-in-mississippi-2-years-posthurricane-katrina/D576CBEB73639E69823A1391B5BF160B)
- 457 7. Thornton W, Voigt L. Disaster rape: Vulnerability of women to sexual assaults during  
458 Hurricane Katrina. J Public Manag Soc ... [Internet]. 2007 [cited 2022 Jun 23];13:23–  
459 49. Available from: [http://sites.google.com/a/jpmsp.com/www/Vol13Iss2-  
460 DisasterRape-ThorntonandVo.pdf](http://sites.google.com/a/jpmsp.com/www/Vol13Iss2-DisasterRape-ThorntonandVo.pdf)
- 461 8. Picardo CW, Burton S, Naponick J, Katrina Reproductive Assessment Team.  
462 Physically and sexually violent experiences of reproductive-aged women displaced by  
463 Hurricane Katrina. J La State Med Soc [Internet]. 2010 Sep 1 [cited 2022 Jun

- 464 23];162(5):282, 284–8, 290. Available from:  
465 <https://europepmc.org/article/med/21141260>
- 466 9. Son C, Hegde S, Smith A, Wang X, Sasangohar F. Effects of COVID-19 on College  
467 Students' Mental Health in the United States: Interview Survey Study. *J Med Internet*  
468 *Res* 2020;22(9)e21279 <https://www.jmir.org/2020/9/e21279> [Internet]. 2020 Sep 3  
469 [cited 2022 Feb 14];22(9):e21279. Available from:  
470 <https://www.jmir.org/2020/9/e21279>
- 471 10. Wakata S, Nishioka D, Takaki Y. Changes in health-related quality of life scores  
472 among low-income patients on social welfare programs in Japan during the COVID-19  
473 pandemic: a single-center repeated cross-sectional study. *BMC Public Health*  
474 [Internet]. 2022 Dec 1 [cited 2022 Dec 7];22(1):1–8. Available from:  
475 <https://bmcpublichealth.biomedcentral.com/articles/10.1186/s12889-022-14597-5>
- 476 11. European Union Agency for Fundamental Rights. Violence against women: An EU-  
477 wide survey main results, European Union Agency for Fundamental Rights [Internet].  
478 2014 [cited 2022 Jun 23]. Available from:  
479 [https://fra.europa.eu/en/publication/2014/violence-against-women-eu-wide-survey-](https://fra.europa.eu/en/publication/2014/violence-against-women-eu-wide-survey-main-results-report)  
480 [main-results-report](https://fra.europa.eu/en/publication/2014/violence-against-women-eu-wide-survey-main-results-report)
- 481 12. al Mamun F, Hosen I, Mamun MA. Sexual violence and rapes' increment during the

- 482 COVID-19 pandemic in Bangladesh [Internet]. Vol. 34, EClinicalMedicine. Lancet  
483 Publishing Group; 2021 [cited 2022 Nov 2]. Available from:  
484 <http://www.thelancet.com/article/S2589537021000973/fulltext>
- 485 13. Nishioka E. Historical Transition of Sexuality Education in Japan and Outline of  
486 Reproductive Health/Rights. *Nihon Eiseigaku Zasshi* [Internet]. 2018 [cited 2022 Nov  
487 27];73(2):178–84. Available from:  
488 [https://www.researchgate.net/publication/325459300\\_Historical\\_Transition\\_of\\_Sexual  
489 ity\\_Education\\_in\\_Japan\\_and\\_Outline\\_of\\_Reproductive\\_HealthRights](https://www.researchgate.net/publication/325459300_Historical_Transition_of_Sexuality_Education_in_Japan_and_Outline_of_Reproductive_HealthRights)
- 490 14. Miyawaki A, Tabuchi T, Tomata Y, Tsugawa Y. Association between participation in  
491 the government subsidy programme for domestic travel and symptoms indicative of  
492 COVID-19 infection in Japan: Cross-sectional study. *BMJ Open* [Internet]. 2021 Apr  
493 13 [cited 2021 Jun 24];11(4):49069. Available from:  
494 <http://dx.doi.org/10.1136/bmjopen-2021-049069>
- 495 15. Rakuten Insight. Rakuten Insight - Asia's Leader in Online Market Research  
496 [Internet]. 2021 [cited 2022 Nov 2]. p. 1. Available from: <https://insight.rakuten.com/>
- 497 16. Hosokawa Y, Okawa S, Hori A, Morisaki N, Takahashi Y, Fujiwara T, et al. The  
498 Prevalence of COVID-19 Vaccination and Vaccine Hesitancy in Pregnant Women: An  
499 Internet-based Cross-sectional Study in Japan. *J Epidemiol* [Internet]. 2022 [cited 2023

- 500 Nov 12];32(4):188–94. Available from: <https://doi.org/10.2188/jea.JE20210458>
- 501 17. Prime Minister of Japan and His Cabinet. Guidelines for Lifting the State of  
502 Emergency [Internet]. 2020 [cited 2021 Jul 7]. Available from:  
503 [https://japan.kantei.go.jp/ongoingtopics/\\_00025.html](https://japan.kantei.go.jp/ongoingtopics/_00025.html)
- 504 18. Kyodo News+. Abe declares coronavirus emergency over in Japan [Internet]. [cited  
505 2021 Jul 7]. Available from:  
506 [https://english.kyodonews.net/news/2020/05/a1f00cf165ae-japan-poised-to-end-state-](https://english.kyodonews.net/news/2020/05/a1f00cf165ae-japan-poised-to-end-state-of-emergency-over-coronavirus-crisis.html)  
507 [of-emergency-over-coronavirus-crisis.html](https://english.kyodonews.net/news/2020/05/a1f00cf165ae-japan-poised-to-end-state-of-emergency-over-coronavirus-crisis.html)
- 508 19. Sieg L. Explainer: As COVID-19 cases surge, Japan sticks to “lockdown-lite” |  
509 Reuters [Internet]. 2021 [cited 2022 Dec 15]. Available from:  
510 [https://www.reuters.com/world/asia-pacific/covid-19-cases-surge-japan-sticks-](https://www.reuters.com/world/asia-pacific/covid-19-cases-surge-japan-sticks-lockdown-lite-2021-08-06/)  
511 [lockdown-lite-2021-08-06/](https://www.reuters.com/world/asia-pacific/covid-19-cases-surge-japan-sticks-lockdown-lite-2021-08-06/)
- 512 20. Wakashima K, Asai K, Kobayashi D, Koiwa K, Kamoshida S, Sakuraba M. The  
513 Japanese version of the Fear of COVID-19 scale: Reliability, validity, and relation to  
514 coping behavior. PLoS One [Internet]. 2020 Nov 5 [cited 2022 Dec  
515 15];15(11):e0241958. Available from:  
516 <https://journals.plos.org/plosone/article?id=10.1371/journal.pone.0241958>
- 517 21. Ahorsu DK, Lin C-Y, Imani V, Saffari M, Griffiths MD, Pakpour AH. The Fear of

- 518 COVID-19 Scale: Development and Initial Validation. *Int J Ment Heal Addict* 2020  
519 [Internet]. 2020 Mar 27 [cited 2021 Jul 9];1–9. Available from:  
520 <https://link.springer.com/article/10.1007/s11469-020-00270-8>
- 521 22. Hashimoto N, Ushitora K, Morioka M, Motegi T, Tanaka K, Tashiro M, et al. Sex  
522 Education Sexuality, Society and Learning School education and development of  
523 gender perspectives and sexuality in Japan. 2017 [cited 2022 Nov 27]; Available from:  
524 <http://www.tandfonline.com/action/journalInformation?journalCode=csed20>
- 525 23. MARCH 2021 Global Gender Gap Report The analysis presented in the Global  
526 Gender Gap Report 2021. 2021 [cited 2022 Nov 27]; Available from:  
527 <http://reports.weforum.org/global->
- 528 24. Fu H. The bumpy road to socialise nature: sex education in Japan. *Cult Health Sex*  
529 [Internet]. 2011 Sep [cited 2022 Dec 15];13(8):903–15. Available from:  
530 <https://pubmed.ncbi.nlm.nih.gov/21787254/>
- 531 25. Ponzetti JJ. Evidence-based approaches to sexuality education: A global perspective.  
532 Evidence-based Approaches to Sex Educ A Glob Perspect. 2015 Jan 1;359–84.
- 533 26. UN Women. COVID-19 and Ending Violence Against Women and Girls [Internet].  
534 United Nations Entity for Gender Equality and the Empowerment of Women (UN  
535 Women); 2020 [cited 2021 Jul 7]. Available from: <https://www.unwomen.org/>



- 536 /media/headquarters/attachments/sections/library/publications/2020/issue-brief-covid-  
537 19-and-ending-violence-against-women-and-girls-en.pdf?la=en&vs=5006
- 538 27. Ditekemena JD, Luhata C, Mavoko HM, Siewe Fodjo JN, Nkamba DM, Van Damme  
539 W, et al. Intimate Partners Violence against Women during a COVID-19 Lockdown  
540 Period: Results of an Online Survey in 7 Provinces of the Democratic Republic of  
541 Congo. *Int J Environ Res Public Heal* 2021, Vol 18, Page 5108 [Internet]. 2021 May  
542 12 [cited 2022 Nov 2];18(10):5108. Available from: [https://www.mdpi.com/1660-](https://www.mdpi.com/1660-4601/18/10/5108/htm)  
543 4601/18/10/5108/htm
- 544 28. Payne JL, Morgan A, Piquero AR. COVID-19 and social distancing measures in  
545 Queensland, Australia, are associated with short-term decreases in recorded violent  
546 crime. *J Exp Criminol* [Internet]. 2022 Mar 1 [cited 2022 Nov 2];18(1):89–113.  
547 Available from: <https://link.springer.com/article/10.1007/s11292-020-09441-y>
- 548 29. Muldoon KA, Denize KM, Talarico R, Fell DB, Sobiesiak A, Heimerl M, et al.  
549 COVID-19 pandemic and violence: rising risks and decreasing urgent care-seeking for  
550 sexual assault and domestic violence survivors. *BMC Med* [Internet]. 2021 Dec 1  
551 [cited 2021 Jun 24];19(1):1–9. Available from: [https://doi.org/10.1186/s12916-020-](https://doi.org/10.1186/s12916-020-01897-z)  
552 01897-z
- 553 30. Gender Equality Bureau, Cabinet Office J. Survey on Violence between Men and

- 554 Women [Internet]. 2018 [cited 2022 Dec 15]. Available from:
- 555 [http://www.gender.go.jp/policy/no\\_violence/e-vaw/chousa/h11\\_top.html](http://www.gender.go.jp/policy/no_violence/e-vaw/chousa/h11_top.html)
- 556 31. Hashimoto S. Sexual violence consultations in Japan up 15 % during pandemic. 2020
- 557 [cited 2022 Dec 4];1–2. Available from:
- 558 [https://english.kyodonews.net/news/2020/11/946cdc3cfe27-sexual-violence-](https://english.kyodonews.net/news/2020/11/946cdc3cfe27-sexual-violence-consultations-in-japan-up-15-during-pandemic.html?phrase=sex)
- 559 [consultations-in-japan-up-15-during-pandemic.html?phrase=sex](https://english.kyodonews.net/news/2020/11/946cdc3cfe27-sexual-violence-consultations-in-japan-up-15-during-pandemic.html?phrase=sex)
- 560 [crimes&words=sex,crime,crimes,Sex](https://english.kyodonews.net/news/2020/11/946cdc3cfe27-sexual-violence-consultations-in-japan-up-15-during-pandemic.html?phrase=sex)
- 561 32. The White Paper on Gender Equality 2021 [Internet]. 2021 Jun [cited 2022 Dec 15].
- 562 Available from:
- 563 [https://www.gender.go.jp/english\\_contents/about\\_danjo/whitepaper/pdf/ewp2021.pdf](https://www.gender.go.jp/english_contents/about_danjo/whitepaper/pdf/ewp2021.pdf)
- 564 33. Mittal S, Singh T. Gender-Based Violence During COVID-19 Pandemic: A Mini-
- 565 Review. *Front Glob Women’s Heal*. 2020 Sep 8;0:4.
- 566 34. Morgan RE, Statistician B, Mason BJ, Intern B. Crimes Against the Elderly, 2003–
- 567 2013. 2014 Nov.
- 568 35. Olshen E, McVeigh KH, Wunsch-Hitzig RA, Rickert VI. Dating violence, sexual
- 569 assault, and suicide attempts among urban teenagers. *Arch Pediatr Adolesc Med*
- 570 [Internet]. 2007 Jun 1 [cited 2021 Jun 24];161(6):539–45. Available from:
- 571 <https://jamanetwork.com/journals/jamapediatrics/fullarticle/570505>

- 572 36. Davidson JRT, Hughes DC, George LK, Blazer DG. The Association of Sexual  
573 Assault and Attempted Suicide Within the Community. *Arch Gen Psychiatry*  
574 [Internet]. 1996 Jun 1 [cited 2022 Aug 22];53(6):550–5. Available from:  
575 <https://jamanetwork.com/journals/jamapsychiatry/fullarticle/497597>
- 576 37. Rosenberg HJ, Jankowski MK, Sengupta A, Wolfe RS, Wolford II GL, Rosenberg SD,  
577 et al. Single and Multiple Suicide Attempts and Associated Health Risk Factors in  
578 New Hampshire Adolescents. *Suicide Life-Threatening Behav* [Internet]. 2005 Oct 1  
579 [cited 2022 Aug 22];35(5):547–57. Available from:  
580 <https://onlinelibrary.wiley.com/doi/full/10.1521/suli.2005.35.5.547>
- 581 38. McDougall EE, Langille DB, Steenbeek AA, Asbridge M, Andreou P. The  
582 Relationship Between Non-Consensual Sex and Risk of Depression in Female  
583 Undergraduates at Universities in Maritime Canada. *J Interpers Violence* [Internet].  
584 2019 Nov 1 [cited 2022 Aug 23];34(21–22):4597–619. Available from:  
585 [https://journals.sagepub.com/doi/10.1177/0886260516675468?url\\_ver=Z39.88-  
586 2003&rfr\\_id=ori%3Arid%3Acrossref.org&rfr\\_dat=cr\\_pub++0pubmed](https://journals.sagepub.com/doi/10.1177/0886260516675468?url_ver=Z39.88-2003&rfr_id=ori%3Arid%3Acrossref.org&rfr_dat=cr_pub++0pubmed)
- 587 39. BRASOR P. In Japan no one wants to talk about sex education | The Japan Times  
588 [Internet]. 2018 [cited 2022 Dec 22]. Available from:  
589 <https://www.japantimes.co.jp/news/2018/04/07/national/media-national/japan-no-one->

- 590 wants-talk-sex-education/
- 591 40. Breiding MJ, Smith SG, Basile KC, Walters ML, Chen J, Merrick MT. Prevalence and  
592 Characteristics of Sexual Violence, Stalking, and Intimate Partner Violence  
593 Victimization—National Intimate Partner and Sexual Violence Survey, United States,  
594 2011. *MMWR Surveill Summ* [Internet]. 2014 Sep 9 [cited 2022 Aug 23];63(8):1.  
595 Available from: [/pmc/articles/PMC4692457/](#)
- 596 41. Markowitz FE. Socioeconomic disadvantage and violence: Recent research on culture  
597 and neighborhood control as explanatory mechanisms. *Aggress Violent Behav*. 2003  
598 Mar 1;8(2):145–54.
- 599 42. Department of Reproductive Health and Research World Health Organization.  
600 Violence against women [Internet]. 2014 [cited 2021 Jun 24]. Available from:  
601 [https://apps.who.int/iris/bitstream/handle/10665/112325/WHO\\_RHR\\_14.11\\_eng.pdf](https://apps.who.int/iris/bitstream/handle/10665/112325/WHO_RHR_14.11_eng.pdf)
- 602 43. Willis M, Hunt M, Wodika A, Rhodes DL, Goodman J, Jozkowski KN. Explicit  
603 Verbal Sexual Consent Communication: Effects of Gender, Relationship Status, and  
604 Type of Sexual Behavior. <https://doi.org/10.1080/1931761120191565793> [Internet].  
605 2019 Jan 2 [cited 2022 Nov 27];31(1):60–70. Available from:  
606 <https://www.tandfonline.com/doi/abs/10.1080/19317611.2019.1565793>
- 607 44. Ministry of Justice. Ministry of Justice: FAQs on Amendments to Laws Related to

- 608 Sexual Crimes [Internet]. [cited 2023 Nov 12]. Available from:  
609 [https://www.moj.go.jp/keiji1/keiji12\\_00200.html](https://www.moj.go.jp/keiji1/keiji12_00200.html)
- 610 45. Tabuchi T, Shinozaki T, Kunugita N, Nakamura M, Tsuji I. Study Profile: The Japan  
611 “Society and New Tobacco” Internet Survey (JASTIS): A Longitudinal Internet  
612 Cohort Study of Heat-Not-Burn Tobacco Products, Electronic Cigarettes, and  
613 Conventional Tobacco Products in Japan. *J Epidemiol* [Internet]. 2019 Nov 5 [cited  
614 2022 Dec 21];29(11):444–50. Available from: <https://doi.org/10.2188/jea.JE20180116>
- 615 46. Kotera Y, Van Laethem M, Ohshima R. Cross-cultural comparison of mental health  
616 between Japanese and Dutch workers: relationships with mental health shame, self-  
617 compassion, work engagement and motivation. *Cross Cult Strateg Manag*. 2020 Sep  
618 3;27(3):511–30.
- 619

Figure 1. Forest plot of the incidence rate of non-consensual sex of each factor (reference) among the participants.

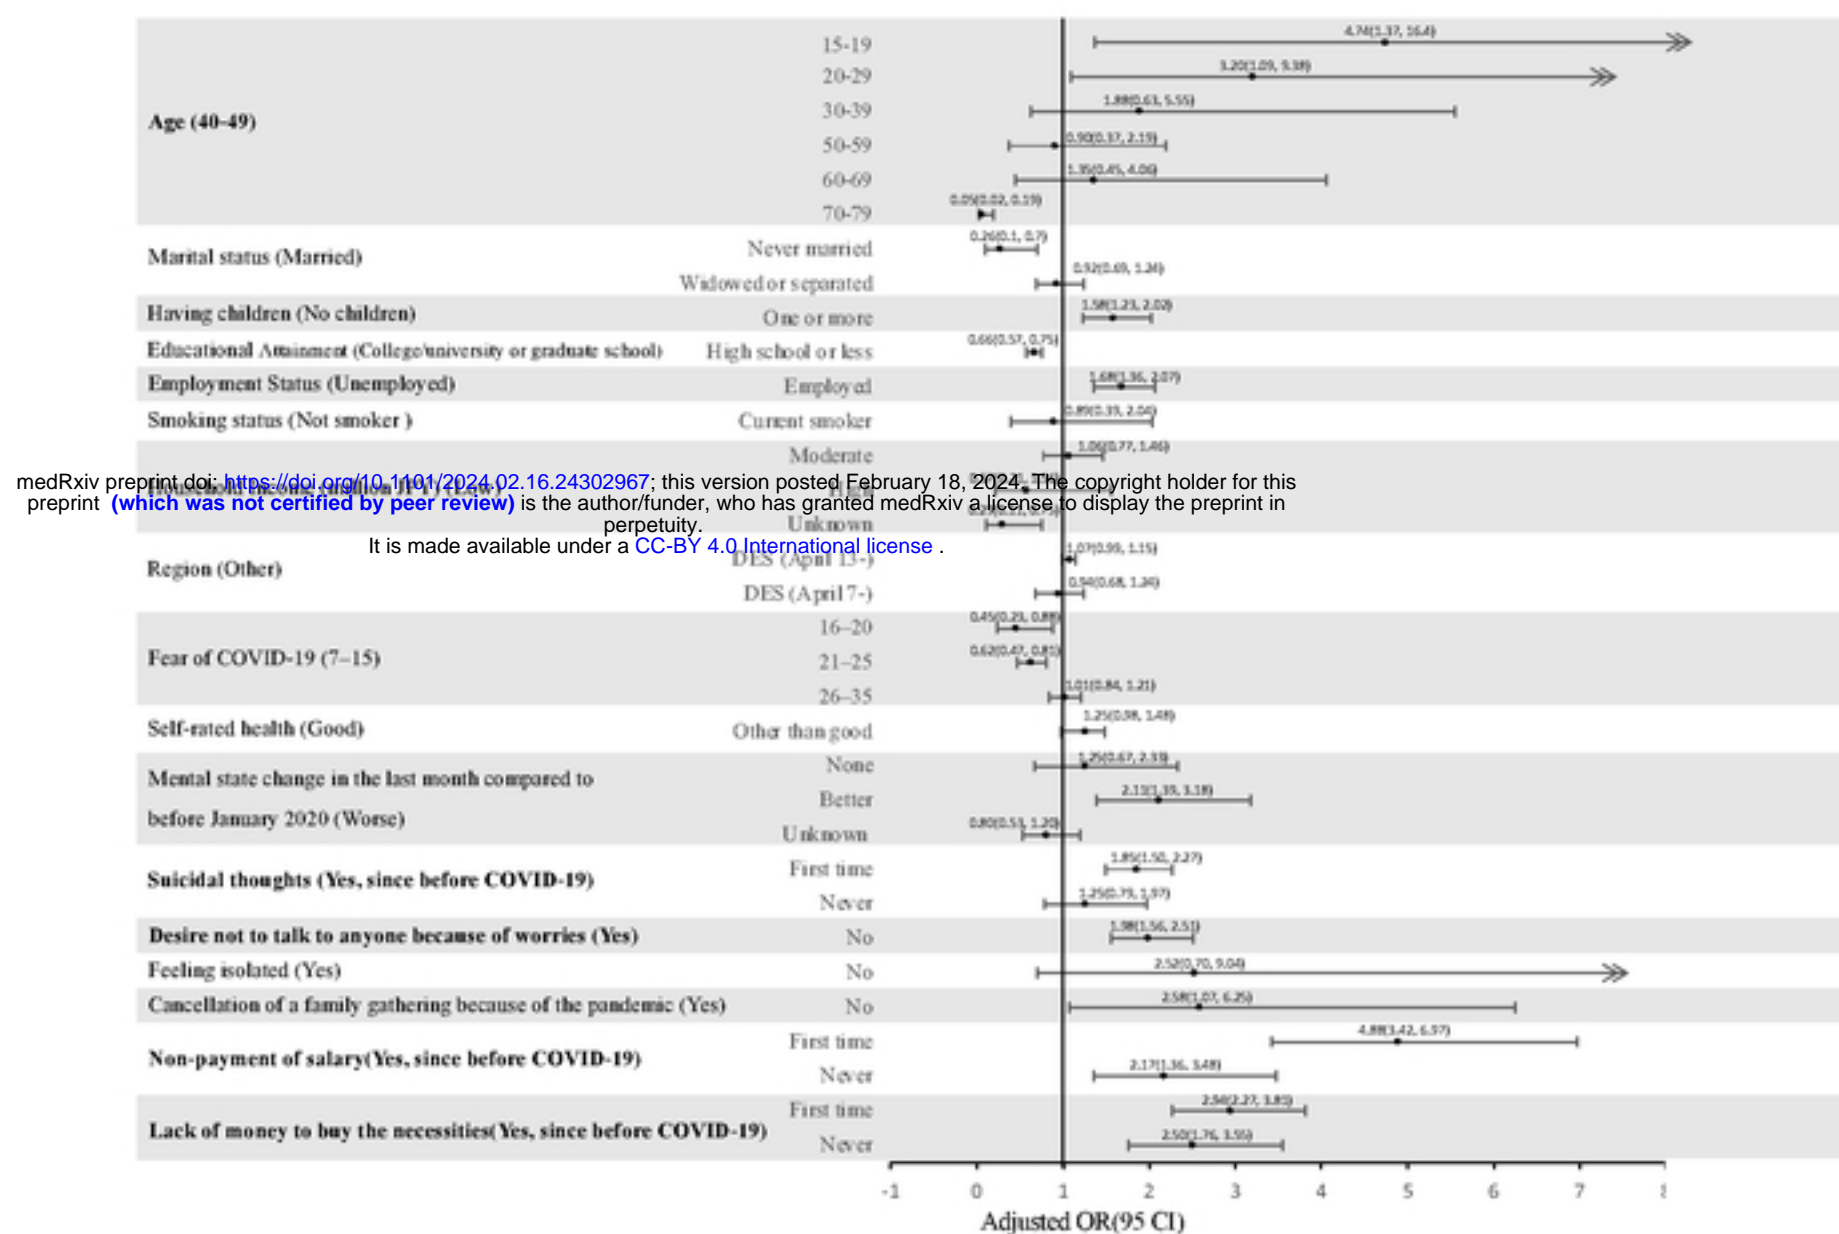

Source: http://medrxiv.org/content/10.1101/2024.02.16.24302967v1.full.pdf
